# Supplementary material for: Hydro-nanofibrous mesh deep cell penetration: a strategy based on peeling of electrospun coaxial nanofibers
Source: Royal Society of Chemistry journal article supplement (doi:10.1039/c7nr04928e), 2018-01-01
Supplement: c7nr04928e1.pdf [file c7nr04928e1.pdf]

Table S1. Calcium concentration in ethanol/dw mixture 3/7 for alginate crosslinking in PCL/AL NF.

|                               | CaCl <sub>2</sub> (% wt) | CaCl <sub>2</sub> (mM) | COO <sup>-</sup> : Ca <sup>2+</sup> |
|-------------------------------|--------------------------|------------------------|-------------------------------------|
| ALNF1 (ALNF <sub>high</sub> ) | 2.000                    | 180                    | 1:8500                              |
| ALNF2                         | 0.240                    | 21                     | 1:1000                              |
| ALNF3                         | 0.100                    | 9                      | 1:500                               |
| ALNF4 (ALNF <sub>mid</sub> )  | 0.020                    | 1.8                    | 1:100                               |
| ALNF5                         | 0.010                    | 0.9                    | 1:50                                |
| ALNF6 (ALNF <sub>low</sub> )  | 0.006                    | 0.54                   | 1:30                                |
| ALNF7                         | 0.002                    | 0.18                   | 1:10                                |
| ALNF0                         | -                        | -                      | -                                   |

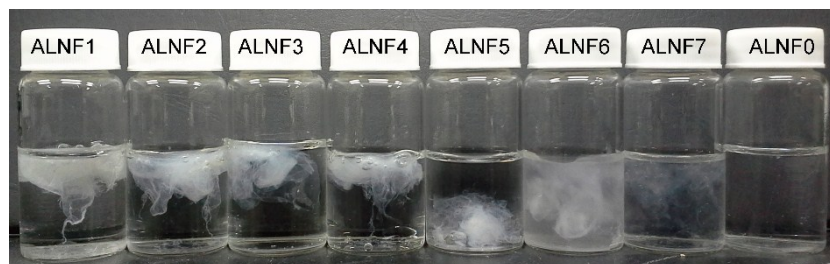

Figure S1. Alginate nanofiber suspension in distilled water after discarding PCL shell.

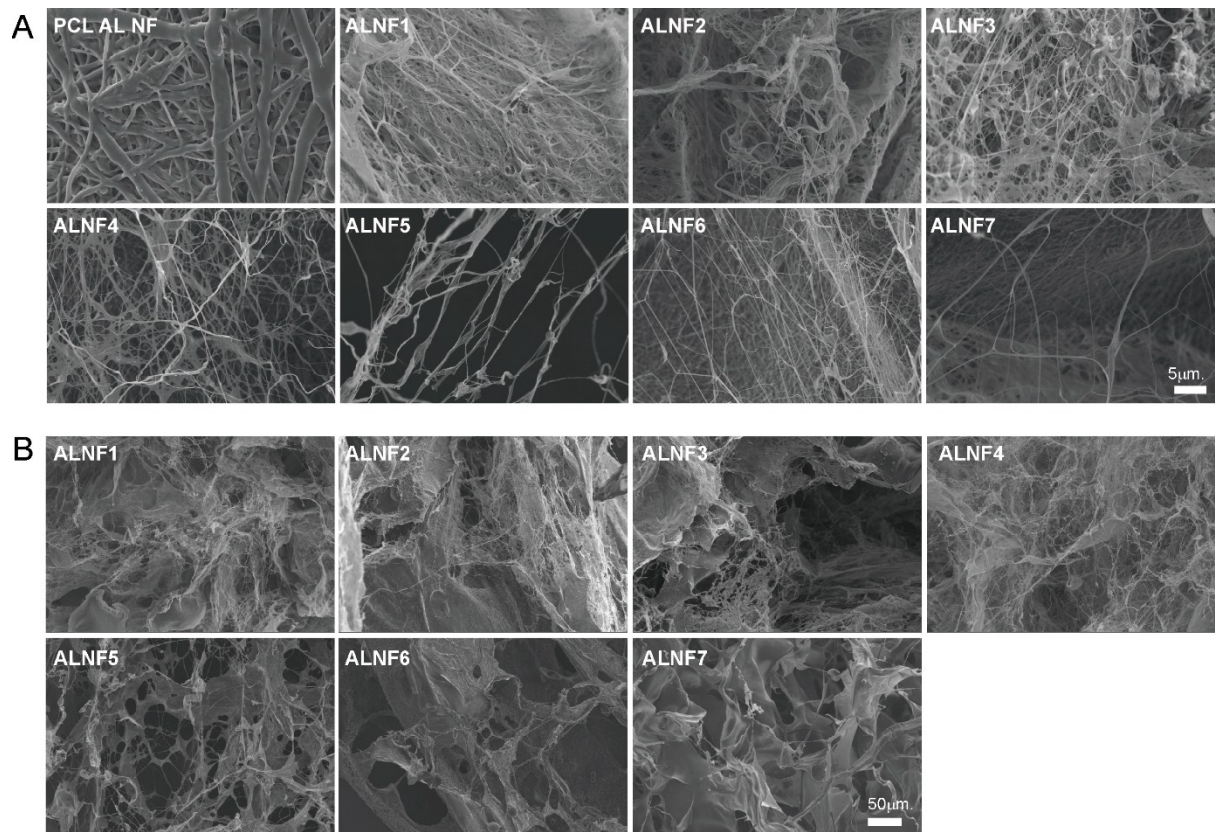

Figure S2. Morphology of freeze dried PCL/AL nanofiber and alginate nanofiber by scanning electron microscope with (A) high and (B) low magnification.

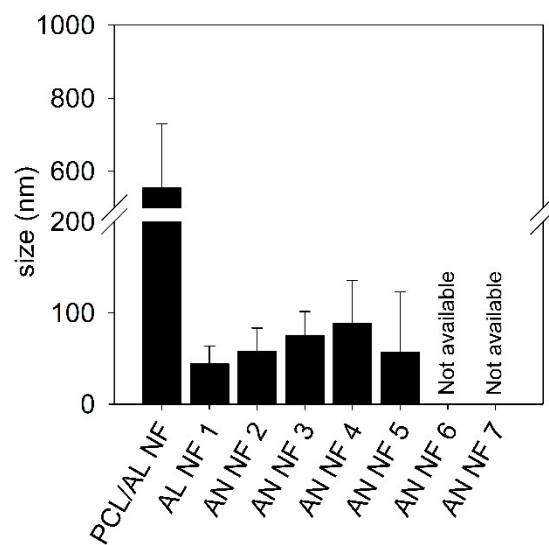

Figure S3. The average fiber diameter according to calcium concentration that 50 ~70 fiber diameter were measured in SEM image.

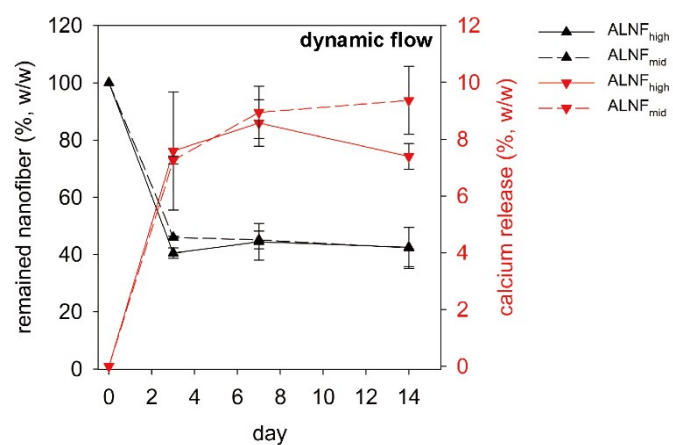

Figure S4. Remaining weight of nanofiber and calcium release profile in phosphate buffer saline with 200rpm shaking at 37°C.

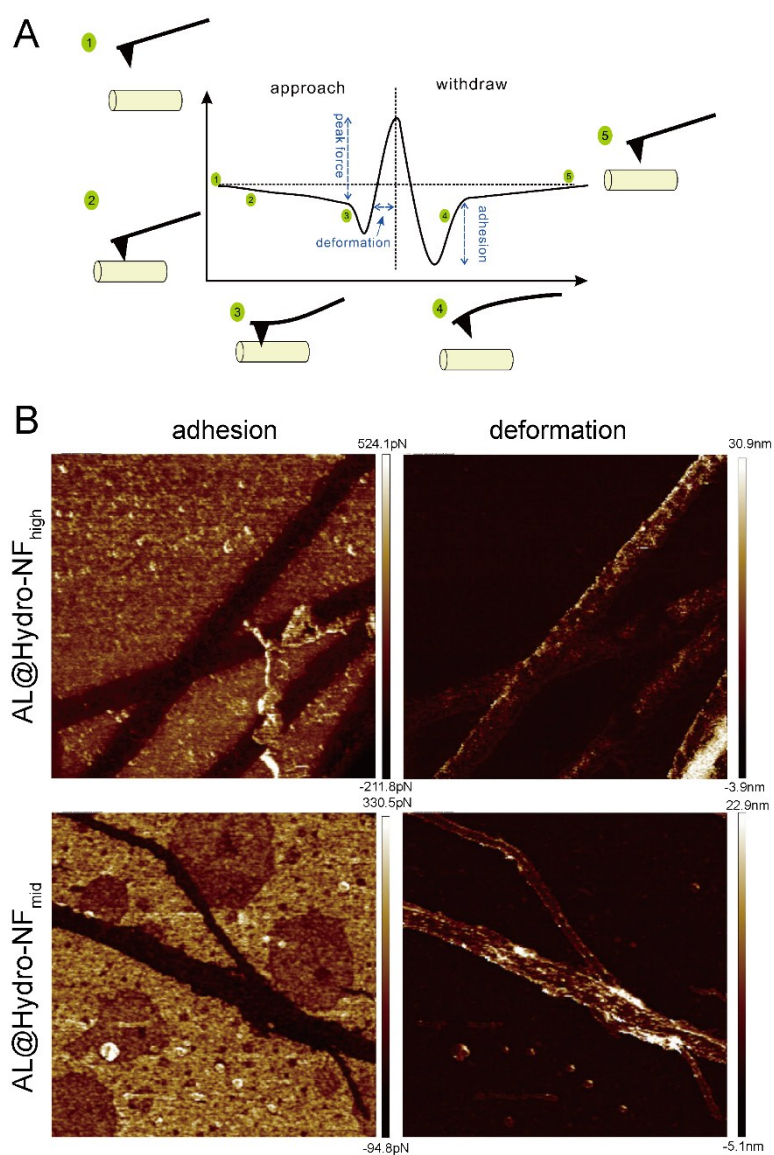

Figure S5. Scheme of nanoindentation process by PF-QNM mode and the profiles obtained at each of steps.
